# Supplementary material
Source: Springer Nature journal article supplement (https://www.springermedizin.de/resource/supplementary/12974_2011_392_MOESM7_ESM.pdf/9601542)

Control Tetramer

MOG<sub>p38-41</sub> Tetramer

Day 6

LNC

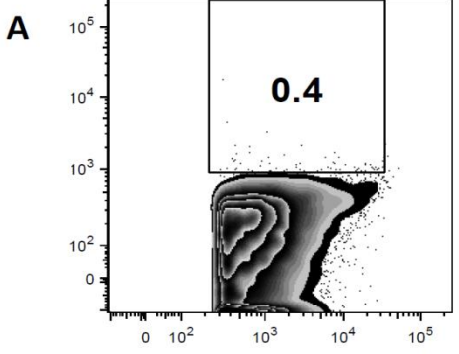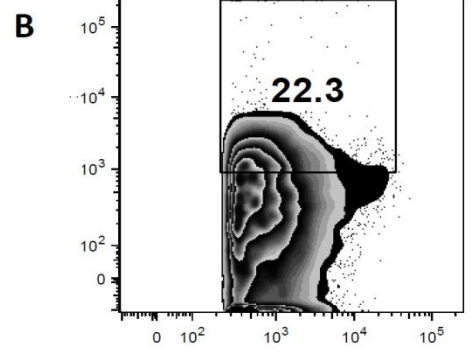

SPC

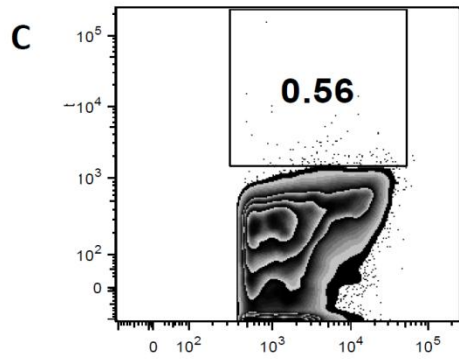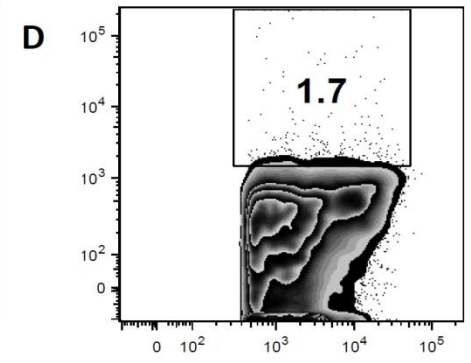

Tetramer ↑

Day 12

LNC

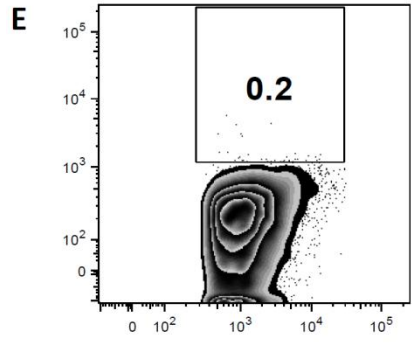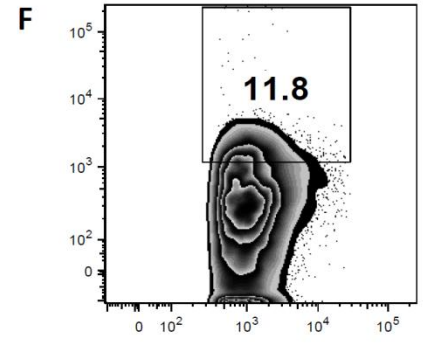

SPC

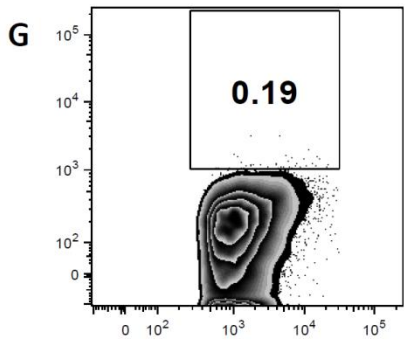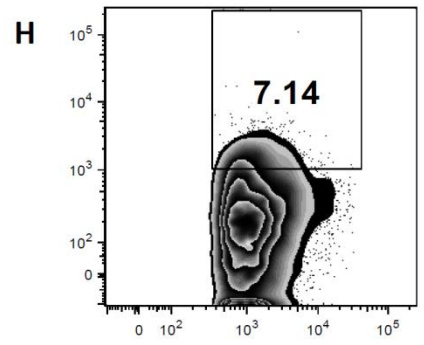

CD44 →

Supplement: MOESM7 [file 9601542]
